# Supplementary material for: High temperature stable WC1−x@C and TiC@C core–shell nanoparticles by pulsed plasma in liquid
Source: Royal Society of Chemistry journal article supplement (doi:10.1039/c2ra22028h), 2012-11-06

Supporting Information for:

**High Temperature Stable WC<sub>1-x</sub>@C and TiC@C Core-Shell  
Nanoparticles by Pulsed Plasma in Liquid**

Zhympargul Abdullaeva <sup>a</sup>, Emil Omurzak <sup>b</sup>, Chihiro Iwamoto <sup>c</sup>, Hiroki Okudera <sup>d</sup>, Michio Koinuma <sup>e</sup>, Shintaro Takebe <sup>b</sup>, Saadat Sulaimankulova <sup>f</sup> and Tsutomu Mashimo <sup>\* g</sup>

<sup>a</sup>Graduate School of Science and Technology, Kumamoto University, Kumamoto, 860-8555, Japan

<sup>b</sup>Priority Organization for Innovation and Excellence, Kumamoto University, Kumamoto, 860-8555, Japan

<sup>c</sup>Faculty of Engineering, Kumamoto University, Kumamoto, 860-8555, Japan

<sup>d</sup>Faculty of Natural System, Institute of Science and Engineering, Kanazawa University, Kanazawa, 920-1192, Japan

<sup>e</sup>Faculty of Applied Chemistry and Biochemistry, Kumamoto University, Kumamoto, 860-8555, Japan

<sup>f</sup>Institute of Chemistry and Chemical Technology, National Academy of Sciences, Chui pr. 267, Bishkek, 720071, Kyrgyzstan

<sup>g</sup>Shock Wave and Condensed Matter Research Center, Kumamoto University, Kumamoto, 860-8555, Japan.

\*E-mail: mashimo@gpo.kumamoto-u.ac.jp; Fax: +81 96 342 3293; Tel: +81 96 342 3295

Supplementary information includes XPS plots for WC<sub>1-x</sub>@C and TiC@C core shell nanoparticles synthesized by pulsed plasma in liquid. CIF files for WC<sub>1-x</sub> and TiC are available on the ICSD database (CSD-424342 C1 W1 and CSD-424343 C1 Ti1).

**Supplementary Figure 1.**

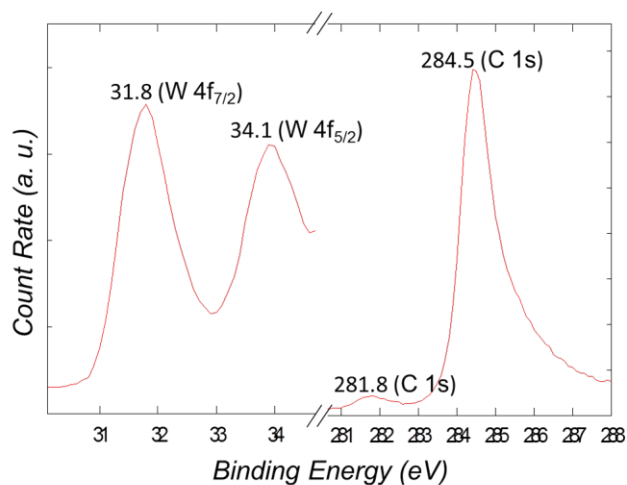

## Supplementary Figure 2.

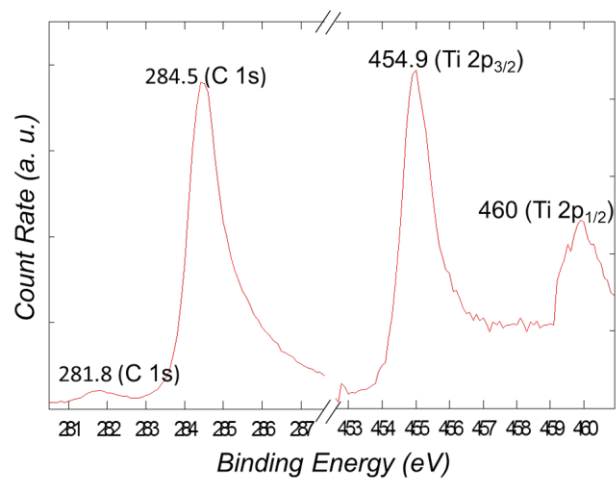

Supplement: c2ra22028h.pdf [file c2ra22028h.pdf]
